# Supplementary material for: Ran GTPase-Activating Protein 1 Is a Therapeutic Target in Diffuse Large B-Cell Lymphoma
Source: PubMed Central journal article supplement (PMC3819250; doi:10.1371/journal.pone.0079863), 2013-11-06
Supplement: pone.0079863.s001.pdf [file pone.0079863.s001.pdf]

**Supporting Information File S1 for**  
**Ran GTPase-activating protein 1 is a therapeutic target in diffuse**  
**large B-cell lymphoma**

Kung-Chao Chang<sup>1\*</sup>, Wei-Chao Chang<sup>2†</sup>, Yao Chang<sup>3</sup>, Liang-Yi Hung<sup>4</sup>, Chien-Hsien Lai<sup>4</sup>, Yu-Min Yeh<sup>5</sup>, Yu-Wei Chou<sup>1</sup> and Chung-Hsuan Chen<sup>2\*</sup>

<sup>1</sup>Department of Pathology, and <sup>5</sup>Department of Internal Medicine, National Cheng Kung University and Hospital, Tainan, Taiwan;

<sup>2</sup>Genomics Research Center, Academia Sinica, Taipei, Taiwan;

<sup>3</sup>Division of Infectious Diseases, National Health Research Institute, Tainan, Taiwan;

<sup>4</sup>Institute of Bioinformatics and Biosignal Transduction, National Cheng Kung University, Tainan, Taiwan

<sup>†</sup>New affiliation information: The Graduate Institute of Cancer Biology and Center for Molecular Medicine, China Medical University and Hospital, Taichung, Taiwan

**\*Correspondence:**

Kung-Chao Chang, MD, PhD, Department of Pathology, National Cheng Kung University Hospital, 138 Sheng-Li Road, Tainan, 704 Taiwan, Tel: 886-6-235-3535 ext. 2636; Fax: 886-6-276-6195; E-mail: [changkc@mail.ncku.edu.tw](mailto:changkc@mail.ncku.edu.tw) or

Chung-Hsuan Chen, PhD, The Genomics Research Center, Academia Sinica, 128 Academia Road, Sec. 2, Nankang, Taipei 115, Taiwan, Tel: 886-2-2787-1200; Fax: 886-2-2789-9923; E-mail: [winschen@gate.sinica.edu.tw](mailto:winschen@gate.sinica.edu.tw)

## 1 **Supporting Materials and Methods**

### 2 *Culture of DLBCL and B-lymphoblastoid cell lines*

3 The cells (HT, SU-DHL-5 and EBV-transformed B-lymphoblastoid cell line  
4 [LCL]) were cultured at 37°C and 7% CO<sub>2</sub> in RPMI 1640 medium (Gibco/BRL,  
5 Grand Island, NY, USA) supplemented with 10% heat-inactivated FCS, 4 mM of  
6 glutamine, 75 units/ml of streptomycin, and 100 units/ml of penicillin. Before the  
7 analysis, the DLBCL and LCL lines were washed three times with PBS to minimize  
8 contamination from serum. Cell viability was determined using the trypan blue  
9 exclusion test. Samples from whole cell lysate were normalized based on protein  
10 concentration and labeled for comparative proteomics analysis.

### 11 *Proteomic analysis*

#### 12 *Protein separation and in-gel digestion*

13 Each  $5 \times 10^5$  cells were lysed by boiling and each 30 µg of extracted protein was  
14 applied to 10% polyacrylamide gel electrophoresis. The gel was subsequently  
15 visualized through Coomassie blue-staining. Gel lanes were divided into 18 sections  
16 and all slices were cut into small gel pieces ( $< 1 \text{ mm}^3$ ), followed by in-gel digestion.  
17 All in-gel digestions of proteins were done manually in a laminar flow hood to reduce  
18 the amount of keratin contamination. The gel pieces were destained with 50%  
19 acetonitrile (ACN) and 25 mM of ammonium bicarbonate. Then, the gel pieces were  
20 placed in 10 mM of dithiothreitol for 45 min at 56°C to reduce disulfide bonds. An  
21 alkylation reaction was performed using freshly prepared iodoacetamide (55 mM) for  
22 45 min at room temperature in the dark. Sequencing grade trypsin (final concentration:  
23 4 ng/µl) was used to digest protein at 37°C for 16-18 h. Tryptic peptides were  
24 extracted using a 60% ACN/1% trifluoroacetic acid solution. After the peptides had  
25 been dried to remove the solvent, the re-dissolved tryptic peptides were subjected to

1 LC LTQ-FT ICR MS analysis.

2 *LC LTQ-FT ICR MS analysis*

3 MS/MS experiments were performed with an LTQ-FT ICR MS (Thermo  
4 Electron, San Jose, CA, USA) equipped with a nano-electrospray ion source (New  
5 Objective, Woburn, MA, USA), a binary HPLC pump (1100 Series; Agilent  
6 Technologies, Santa Clara, CA, USA) and an autosampler (Famos 900 / 920 LC  
7 Packings, Sunnyvale, CA, USA). Tryptic peptide mixtures were injected at a 10  
8  $\mu\text{L}/\text{min}$  flow rate into a self-packed pre-column in line with a reverse phase  $\text{C}_{18}$   
9 nano-column ( $75 \mu\text{m}$  I.D.  $\times$  200 mm) that used resin (particle size,  $5 \mu\text{m}$ ; pore size,  
10  $200 \text{ \AA}$ ) (Magic  $\text{C}_{18}\text{AQ}$ ; Michrom Bioresources, Auburn, CA, USA). The analytic  
11 program was set at a linear gradient from 5% to 50% ACN with a 60-min running  
12 cycle and a split flow rate of  $300 \text{ nl}/\text{min}$ . The full-scan survey MS experiment ( $m/z$   
13 320-2,000) was executed in FT ICR MS with a mass resolution of 100,000 at  $m/z$  400.  
14 The top ten most abundant multiply charged ions were sequentially isolated for  
15 MS/MS by LTQ. Singly charged ions were rejected for MS/MS sequencing.

16 *Mascot search and label-free quantitative analysis*

17 The \*.raw files of spectra were converted to \*.mgf files (Mascot Daemon 2.2;  
18 Matrix Science Ltd., London, UK) and merged into a single file for searching using  
19 Mascot Daemon software based on the IPI human database (v 3.66). The following  
20 Mascot Daemon parameter settings were used: the peptide tolerance was 15 ppm with  
21  $2^+$  and  $3^+$  peptide charges and the MS/MS tolerance was 0.6 Da. Two missed  
22 cleavages by trypsin were allowed; carbamidomethyl (C) was used as a fixed  
23 modification; and oxidation (M) and deamidated (NQ) were used as variable  
24 modifications. The significance threshold for the identification was set as  $p < 0.01$ ,  
25 and at least two peptides were matched. Label-free quantitative analysis was done

1 using quantitative proteomics software (MaxQuant; Max Planck Institute of  
2 Biochemistry, Munich, Germany. Available at: <http://www.maxquant.org/>) [22].

### 3 ***Enzyme-linked immunosorbent assay (ELISA) for RanGAP1***

4 Polystyrene 96 well ELISA plates (eBioscience, San Diego, CA, USA) were  
5 incubated overnight at 4°C with 100 µl of coating buffer (0.1 M NaHCO<sub>3</sub> [pH = 9.6])  
6 containing 0.2 µg/ml of purified capture monoclonal antibody (mAb, RanGAP1, C-5;  
7 Santa Cruz). The wells were blocked with 100 µl of PBS with 10% FBS for 1 h at  
8 room temperature (RT), and triplicates of 100 µl of serially diluted standard  
9 (RanGAP1 full-length recombinant protein, Novus Biologicals, Littleton, CO, USA)  
10 or test samples at various dilutions were added and incubated for 2 h at 37°C. Control  
11 and samples as well as subsequent detection reagents were diluted in PBS with 0.05%  
12 Tween 20. The fluid from the wells was aspirated and the plates were washed and  
13 then incubated for 1 h at RT with 100 µl of detection polyclonal Ab (RanGAP1, N-19,  
14 sc-1862; Santa Cruz) at 0.8 µg/ml. Subsequently, the wells were washed and then  
15 incubated with 100 µl of goat IgG-HRP conjugate (1:2500, Dako) for 1 h at RT.  
16 Between incubations, the plates were washed with PBS containing 0.05% Tween 20.  
17 Finally, 100 µl of tetramethylbenzidine (TMB, ES001-500ML; Millipore, Billerica,  
18 MA, USA) buffer was added to each well and incubated in the dark for 30 min. After  
19 adding stop solution (2N H<sub>2</sub>SO<sub>4</sub>), the optical density (OD) was measured with a  
20 spectrophotometer (µQuant, BIO-TEK instruments, Inc., Winooski, VT, USA) at 450  
21 nm.

### 22 ***Transfecting RANGAP1-specific shRNA into cell lines***

23 The sequences for the RANGAP1 shRNA were as follows:

24 5'-GATCCCCCAAGAGTGAAGACAAGGTCAATTCAAGAGATTGACCTTGTCT  
25 TCACTCTTGTTTTTGGAAA-3' (forward), and

1 5'-AGCTTTTCCAAAAACAAGAGTGAAGACAAGGTCAATCTCTTGAATTGAC  
2 CTTGTCTTCACTCTTGGGG-3' (reverse). shRNAs were controlled for sequence  
3 specificity using a BLAST search and did not show homology to other known human  
4 genes. All shRNAs were purchased from Purigo Biotech (Taipei, Taiwan). The  
5 plasmids expressing gene-specific shRNA were constructed using synthetic  
6 oligonucleotides cloned into the *Bg*III/*Hind*III cloning sites of the pSUPER-EGFP  
7 vector (pSUPER RNAi System; OligoEngine, Seattle, WA, USA). Each of the  
8 shRNA expression plasmids had a 21 nucleotide gene-specific target in both sense and  
9 antisense orientation, separated by a 9 nucleotide spacer sequence. The 5' end  
10 corresponded to the *Bg*III site, while the 3' end contained the five-thymidine sequence  
11 and *Hind*III-corresponding nucleotides. In all siRNA (small interfering RNA)  
12 experiments, a control sample treated with empty vector was included. Other two sets  
13 of siRNA sequences were as follows: siRNA1,  
14 5'-GATCCCCGAACTTGTCAATTCTGTGAAATTTCAAGAGAATTCACAGAATG  
15 ACAAGTTCTTTTTGGAAA-3' (forward), and  
16 5'-AGCTTTTCCAAAAAGAACTTGTCAATTCTGTGAAATTCTCTTGAAATTTCA  
17 CAGAATGACAAGTTCGGG-3' (reverse); siRNA2,  
18 5'-GATCCCCCTGCCTTCCTAAAGGTGTCATTTCAAGAGAATGACACCTTTAG  
19 GAAGGCAGTTTTTGGAAA-3' (forward), and  
20 5'-AGCTTTTCCAAAAACTGCCTTCCTAAAGGTGTCATTCTCTTGAAATGACA  
21 CCTTTAGGAAGGCAG GGG-3' (reverse).

22 An shRANGAP1 expression construct was transfected using an electroporation  
23 machine (Microporator; Digital Bio Technology, Suwon, Korea) with 6-8 µg of DNA  
24 at 1100-1300 V for 20-30 ms [23]. Transfection efficiency was determined by flow  
25 cytometric analysis on fluorescent cells with a flow cytometer (FACSCalibur with

1 CellQuest Pro 4.0.2; Becton Dickinson, Franklin Lakes, NJ, USA) [27].

2 ***Quantitative real-time polymerase chain reaction (Q-PCR)***

3 Primers used for Q-PCR were described as followed: *Aurora-A* forward,

4 5'-AATGCCCTGTCTTACTGTCATTC-3' and reverse,

5 5'-TCCAGAGATCCACCTTCTCATC-3'; *Aurora-B* forward, 5'-

6 CATGGAGGAGTTGGCAGATGC-3' and reverse 5'-

7 TTAGGTCCACCTTGACGATGC-3'; *actin* forward,

8 5'-CTGGACTTCGAGCAAGAGATG-3' and reverse

9 5'-TGATGGAGTTGAAGGTAGTTTCG-3'.

1 **Supporting Figure S1**

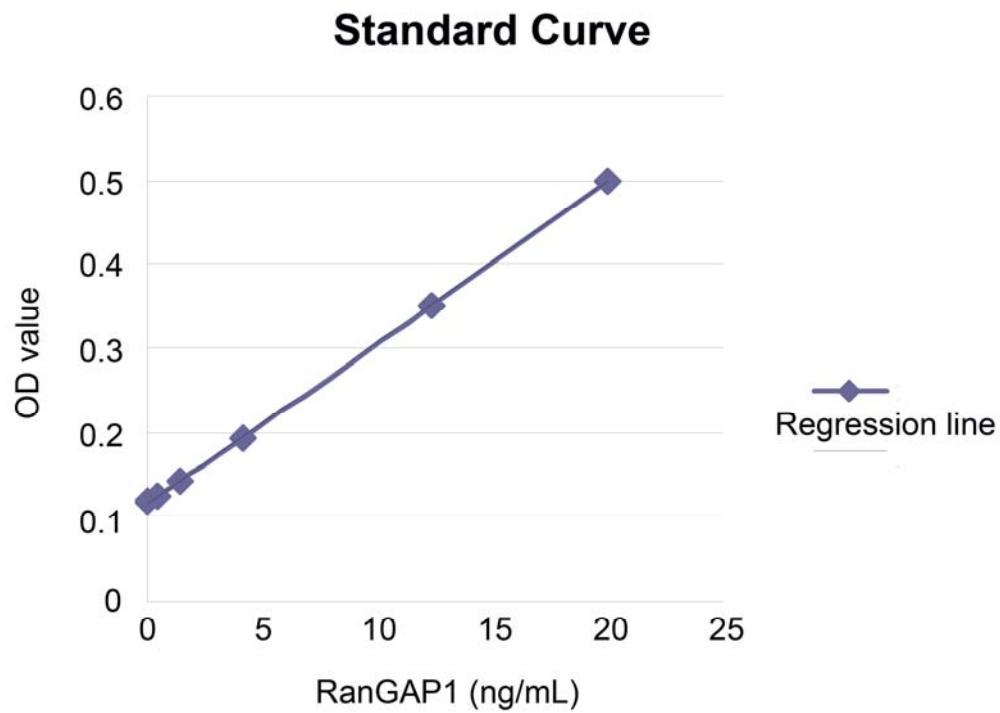

2

3 **Supporting Figure S1. The standard curve of RanGAP1 serum level.**

4 The colorimetric noncompetitive (immunometric sandwich assay) ELISA has been  
5 developed and the standard curve was established by testing triplicates of serially  
6 diluted standard. The detection range was 0-20 ng/mL (OD: 0.11-0.5). The regression  
7 line formula is:  $y=0.0191x+0.116$ ,  $R^2=0.9998$ .

8

9

1 Supporting Figure S2.

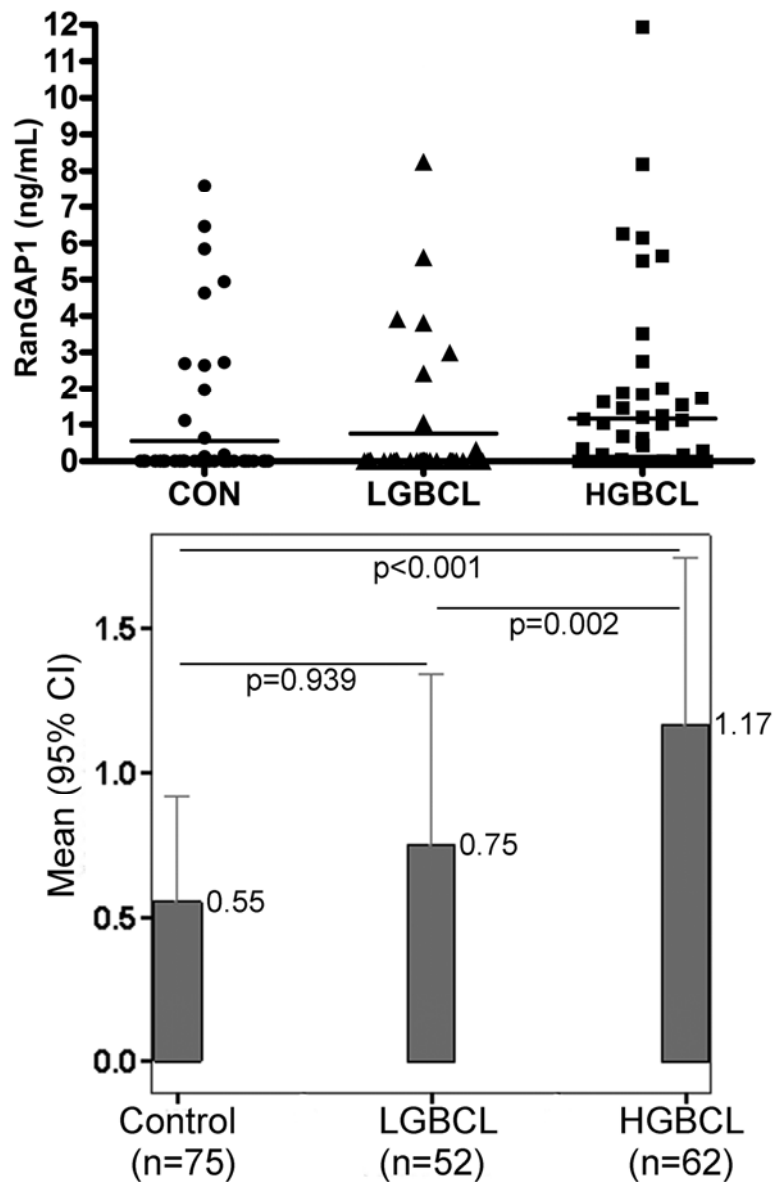

2

3 **Supporting Figure S2. Higher serum level of RanGAP1 in patients with**

4 **high-grade BCL than in low-grade BCL and healthy controls.** Serum levels of

5 RanGAP1 were higher in patients with high-grade BCL ( $1.71 \pm 2.28$  ng/mL,  $n = 62$ )

6 than in low-grade BCL ( $0.75 \pm 2.12$  ng/mL,  $n = 52$ ) and healthy controls ( $0.55 \pm 1.58$

7 ng/mL,  $n = 75$ ) (high-grade BCL vs. low-grade BCL,  $p = 0.002$ ; high-grade BCL vs.

8 control,  $p < 0.001$ , Mann-Whitney U test). However, the RanGAP1 serum level was

9 not so sensitive since half ( $n = 31$ ) cases of high-grade BCL were not elevated.



1 **Supporting Figure S3**

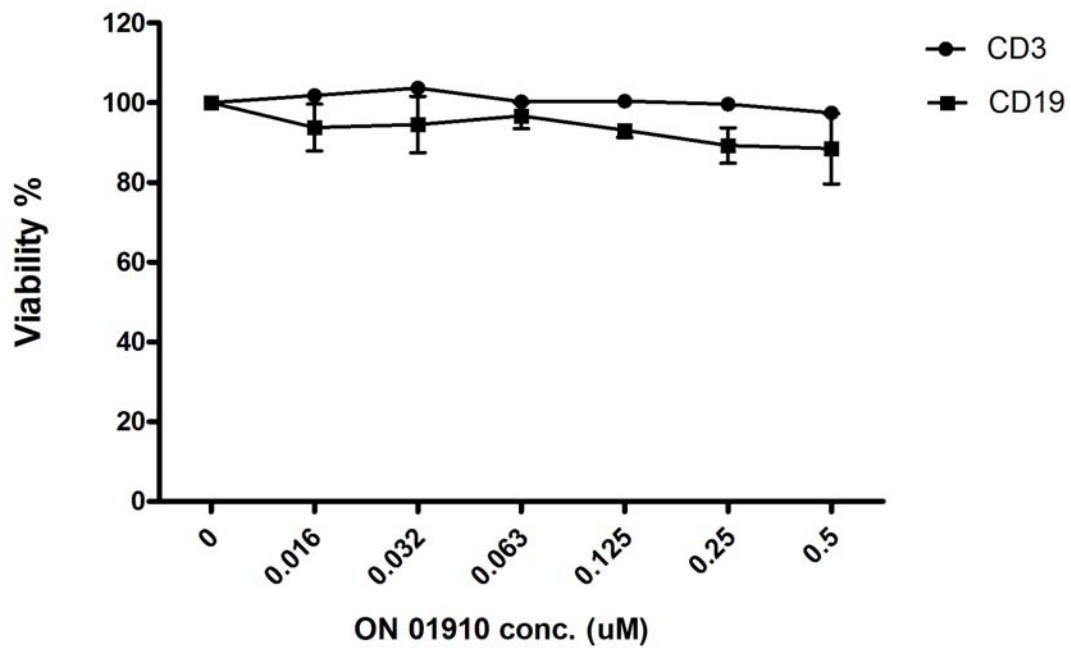

2

3 **Supporting Figure S3. No cytotoxic effect on B or T cells from healthy donors at**

4 **48 hours.** Peripheral blood mononuclear cells of healthy donors were treated with ON

5 01910.Na at increasing doses for 48 hours. Then, cell viability was assessed by flow

6 cytometry by gating CD3<sup>+</sup> T cells and CD19<sup>+</sup> B cells. The percentage of viable cells

7 normalized to the untreated control is shown.

1 **Supporting Figure S4**

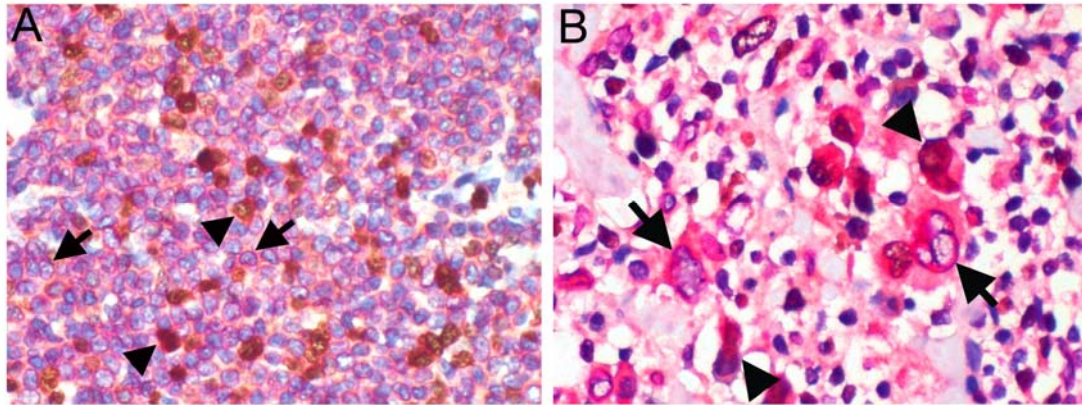

2

3 **Supporting Figure S4. Double staining of RanGAP1 (red in cytoplasm) and**  
4 **Ki-67 (a proliferation marker, brown in nuclei) in mantle cell lymphoma (A) and**  
5 **Hodgkin lymphoma (B).** Many RanGAP1-positive tumor cells were negative for  
6 Ki-67 staining in mantle cell (A, ×400) and Hodgkin lymphomas (B, ×400) (arrow:  
7 RanGAP1<sup>+</sup>/Ki-67<sup>-</sup>; arrowhead: RanGAP1<sup>+</sup>/Ki-67<sup>+</sup>).

**Supporting Table S1.** Protein identification data expressed according to Paris guidelines

| Uniprot |                        | Error    |   |         | Sequence                           | Score |
|---------|------------------------|----------|---|---------|------------------------------------|-------|
| Acc#    | Protein Name           | m/z      | z | (ppm)   |                                    |       |
| P23526  | Adenosylhomocysteinase | 780.3815 | 2 | -0.5853 | ALDIAENEMPGLMR                     | 93    |
| P23526  | Adenosylhomocysteinase | 550.2774 | 3 | 0.1819  | GISEETTTGVHNLYK                    | 100   |
| P23526  | Adenosylhomocysteinase | 944.9854 | 4 | -1.1118 | GISEETTTGVHNLYKMMANGILKVPAINVNSVTK | 41    |
| P23526  | Adenosylhomocysteinase | 573.9517 | 3 | -0.5940 | KALDIAENEMPGLMR                    | 119   |
| P23526  | Adenosylhomocysteinase | 460.9209 | 3 | -0.2246 | KLDEAVAE AHLGK                     | 137   |
| P23526  | Adenosylhomocysteinase | 612.3510 | 3 | -0.1584 | KLDEAVAE AHLGKLNVK                 | 74    |
| P23526  | Adenosylhomocysteinase | 705.7149 | 3 | 1.2895  | MMANGILKVPAINVNSVTK                | 100   |
| P23526  | Adenosylhomocysteinase | 668.0301 | 3 | -0.1086 | SDKLPYKVADIGLAAWGR                 | 123   |
| P23526  | Adenosylhomocysteinase | 420.5328 | 3 | 0.1559  | SKFDNLYGCR                         | 60    |
| P23526  | Adenosylhomocysteinase | 419.5752 | 3 | -0.1964 | VADIGLAAWGRK                       | 107   |
| P23526  | Adenosylhomocysteinase | 631.0000 | 3 | -0.2310 | VAVVAGYGDVGKGCAQALR                | 97    |
| P23526  | Adenosylhomocysteinase | 793.7499 | 3 | 0.6960  | VAVVAGYGDVGKGCAQALRGFGAR           | 59    |
| P23526  | Adenosylhomocysteinase | 356.8769 | 3 | -0.0880 | VNIKPVDR                           | 85    |
| P23526  | Adenosylhomocysteinase | 463.2650 | 3 | -0.2040 | VNIKPVDRYR                         | 60    |
| P23526  | Adenosylhomocysteinase | 393.2278 | 3 | -0.0462 | YSASKPLKGR                         | 81    |
| P27707  | Deoxycytidine kinase   | 450.9066 | 3 | -0.3478 | DAEKPV LFFER                       | 110   |
| P27707  | Deoxycytidine kinase   | 481.2961 | 3 | -0.2589 | IKKISIEG NIAAGK                    | 74    |
| P27707  | Deoxycytidine kinase   | 531.2996 | 3 | -0.0249 | LKDAEKPV LFFER                     | 109   |
| P27707  | Deoxycytidine kinase   | 686.7935 | 2 | 0.2152  | SCPSFSASSEGTR                      | 64    |
| P27707  | Deoxycytidine kinase   | 792.6755 | 3 | 0.8743  | WCNVQSTQDEFEE LTMSQK               | 178   |

|        |                                       |           |   |         |                               |     |
|--------|---------------------------------------|-----------|---|---------|-------------------------------|-----|
| P52701 | DNA mismatch repair protein Msh6      | 881.4405  | 3 | -0.0823 | AAAAPGASPSPPGGDAAWSEAGPGRPLAR | 78  |
| P52701 | DNA mismatch repair protein Msh6      | 889.7889  | 3 | 0.8626  | GGDGPMCRPVILLPEDTPPFLELK      | 58  |
| P52701 | DNA mismatch repair protein Msh6      | 369.4505  | 4 | -0.4559 | GGHFYSAKPEILR                 | 51  |
| P52701 | DNA mismatch repair protein Msh6      | 401.7283  | 4 | 0.1167  | LANLPEEVIQKGHR                | 108 |
| P52701 | DNA mismatch repair protein Msh6      | 433.7521  | 4 | -0.1229 | LANLPEEVIQKGHRK               | 61  |
| P52701 | DNA mismatch repair protein Msh6      | 336.2026  | 3 | 0.4997  | LLKPYTGSK                     | 103 |
| P52701 | DNA mismatch repair protein Msh6      | 594.3041  | 3 | -0.6350 | NRYQLEIPENFTTR                | 71  |
| P52701 | DNA mismatch repair protein Msh6      | 512.6056  | 3 | 0.2851  | QATSISSETKNTLR                | 97  |
| P52701 | DNA mismatch repair protein Msh6      | 429.8932  | 3 | 0.0529  | SPALSDANKASAR                 | 88  |
| P52701 | DNA mismatch repair protein Msh6      | 923.1288  | 3 | -0.0671 | SSLSCSLQEGLIPGSQFWDASKTLR     | 47  |
| P52701 | DNA mismatch repair protein Msh6      | 660.7174  | 3 | 0.0670  | STVDAAEAVHKLLTLIKEL           | 61  |
| P52701 | DNA mismatch repair protein Msh6      | 617.3067  | 4 | 0.3812  | TLFSTHYHSLVEDYSQNVAVR         | 118 |
| P52701 | DNA mismatch repair protein Msh6      | 486.2488  | 3 | 0.2446  | TLLEEEYFREK                   | 101 |
| P49736 | DNA replication licensing factor MCM2 | 633.9549  | 3 | -0.1862 | AESSESFTMASSPAQRR             | 70  |
| P49736 | DNA replication licensing factor MCM2 | 1021.4823 | 3 | -0.1481 | AIPELDAYEAEGLALDDEDVEELTASQR  | 63  |
| P49736 | DNA replication licensing factor MCM2 | 773.3478  | 4 | 0.4157  | ATEDGEEDEEMIESIENLEDLKGHSVR   | 69  |
| P49736 | DNA replication licensing factor MCM2 | 883.1533  | 3 | -0.1071 | DNNELLLFILKQLVAEQVTYQR        | 123 |
| P49736 | DNA replication licensing factor MCM2 | 362.8636  | 3 | -0.0792 | DREAGRGLGR                    | 60  |
| P49736 | DNA replication licensing factor MCM2 | 744.8536  | 2 | 0.7520  | DTVDPVQDEMLAR                 | 120 |
| P49736 | DNA replication licensing factor MCM2 | 831.0822  | 3 | 0.4679  | FDILCVVRDTVDPVQDEMLAR         | 54  |
| P49736 | DNA replication licensing factor MCM2 | 678.0126  | 3 | -0.6861 | FGAQQDTIEVPEKDLVDK            | 43  |
| P49736 | DNA replication licensing factor MCM2 | 565.5459  | 4 | -0.1379 | FGAQQDTIEVPEKDLVDKAR          | 124 |
| P49736 | DNA replication licensing factor MCM2 | 586.8373  | 2 | 0.5195  | GLALALFGGEPK                  | 97  |

|        |                                       |          |   |         |                             |     |
|--------|---------------------------------------|----------|---|---------|-----------------------------|-----|
| P49736 | DNA replication licensing factor MCM2 | 542.6385 | 3 | 0.1122  | GLALALFGGEPKNPGGK           | 96  |
| P49736 | DNA replication licensing factor MCM2 | 631.9536 | 3 | 0.1116  | GLLYDSDEEDEERPAR            | 46  |
| P49736 | DNA replication licensing factor MCM2 | 480.0112 | 4 | -0.1332 | IFASIAPSIYGHEDIKR           | 74  |
| P49736 | DNA replication licensing factor MCM2 | 522.7690 | 4 | -0.6374 | IHLRDYVIEDDVNMAIR           | 61  |
| P49736 | DNA replication licensing factor MCM2 | 343.2013 | 3 | 0.0162  | IRIQESPGK                   | 124 |
| P49736 | DNA replication licensing factor MCM2 | 435.9224 | 3 | -0.1752 | ISHLPLVEELR                 | 100 |
| P49736 | DNA replication licensing factor MCM2 | 556.3310 | 5 | -0.3008 | ISHLPLVEELRSLRQLHLNQLIR     | 50  |
| P49736 | DNA replication licensing factor MCM2 | 330.5262 | 3 | -0.0166 | ITNHIHVR                    | 56  |
| P49736 | DNA replication licensing factor MCM2 | 435.8871 | 3 | -0.1826 | LNQMDQDKVAK                 | 81  |
| P49736 | DNA replication licensing factor MCM2 | 576.2973 | 4 | -0.5071 | NRFGAQQDTIEVPEKDLVDK        | 51  |
| P49736 | DNA replication licensing factor MCM2 | 378.8963 | 3 | -0.3042 | QLHLNQLIR                   | 99  |
| P49736 | DNA replication licensing factor MCM2 | 497.6353 | 3 | 0.5051  | SLRQLHLNQLIR                | 103 |
| P49736 | DNA replication licensing factor MCM2 | 554.9414 | 3 | -0.0827 | THVDSHGHNVFKER              | 92  |
| P49736 | DNA replication licensing factor MCM2 | 660.6762 | 3 | -1.7177 | TSGVVTSTCTGVLPQLSMVK        | 69  |
| P49736 | DNA replication licensing factor MCM2 | 327.8503 | 3 | -0.0673 | YIEKVSSR                    | 52  |
| P25205 | DNA replication licensing factor MCM3 | 878.1106 | 3 | -0.6099 | AIPTTGRGSSGVGLTAAVTTDQETGER | 120 |
| P25205 | DNA replication licensing factor MCM3 | 538.2909 | 3 | 0.0764  | ALKDFVASIDATYAK             | 83  |
| P25205 | DNA replication licensing factor MCM3 | 669.0253 | 3 | -0.1994 | ANRLLNNAFEELVAFQR           | 110 |
| P25205 | DNA replication licensing factor MCM3 | 692.3387 | 3 | 0.2754  | CSVLAAANPVYGRYDQYK          | 54  |
| P25205 | DNA replication licensing factor MCM3 | 771.0775 | 3 | -0.1079 | IIKPVLTKESATYIAEEYSR        | 101 |
| P25205 | DNA replication licensing factor MCM3 | 645.8563 | 4 | -0.0550 | IIKPVLTKESATYIAEEYSRLR      | 51  |
| P25205 | DNA replication licensing factor MCM3 | 404.5788 | 3 | 0.2523  | LIVNVNDLRR                  | 87  |
| P25205 | DNA replication licensing factor MCM3 | 555.2983 | 3 | -0.4969 | LLNNAFEELVAFQR              | 161 |

|        |                                       |          |   |         |                                            |     |
|--------|---------------------------------------|----------|---|---------|--------------------------------------------|-----|
| P25205 | DNA replication licensing factor MCM3 | 485.2282 | 3 | 0.4832  | LRSQDSMSSDTAR                              | 62  |
| P25205 | DNA replication licensing factor MCM3 | 388.8802 | 3 | 0.1901  | SKDIFDQLAK                                 | 118 |
| P25205 | DNA replication licensing factor MCM3 | 397.5377 | 3 | -0.5910 | SVHYCPATKK                                 | 54  |
| P25205 | DNA replication licensing factor MCM3 | 718.0170 | 3 | 0.3516  | TADSQETKESQKVELSESR                        | 65  |
| P25205 | DNA replication licensing factor MCM3 | 513.3069 | 3 | -0.4061 | TLETLIRLATAHAK                             | 106 |
| P25205 | DNA replication licensing factor MCM3 | 777.7179 | 3 | -0.0114 | TVDLQDAEEAVELVQYAYFK                       | 171 |
| P25205 | DNA replication licensing factor MCM3 | 820.4162 | 3 | 0.2187  | TVDLQDAEEAVELVQYAYFKK                      | 99  |
| P25205 | DNA replication licensing factor MCM3 | 464.9125 | 3 | 0.3093  | VRELISDNQYR                                | 64  |
| P33991 | DNA replication licensing factor MCM4 | 786.3825 | 3 | 0.3919  | DMFEEALRALADDDFLTVTGK                      | 61  |
| P33991 | DNA replication licensing factor MCM4 | 469.2527 | 3 | -0.2505 | ELSRKPDIIYER                               | 80  |
| P33991 | DNA replication licensing factor MCM4 | 940.8090 | 3 | -0.5629 | FIDPLAKEEENVGIDITEPLYMQR                   | 136 |
| P33991 | DNA replication licensing factor MCM4 | 877.1032 | 3 | -1.1575 | GLQVDLQSDGAAAEDIVASEQSLGQK                 | 94  |
| P33991 | DNA replication licensing factor MCM4 | 633.3157 | 3 | -0.3575 | GSSAVGLTAYVMKDPETR                         | 55  |
| P33991 | DNA replication licensing factor MCM4 | 765.7316 | 3 | -0.5290 | LGEINVIGEPFLNVNCEHIK                       | 127 |
| P33991 | DNA replication licensing factor MCM4 | 468.9889 | 4 | 0.2407  | LHGLDEEAEQKLFSEK                           | 78  |
| P33991 | DNA replication licensing factor MCM4 | 779.7297 | 6 | 0.2085  | LQESPEDMPAGQTPHTVILFAHNDLVDKVQPGRVNVVTGIYR | 31  |
| P33991 | DNA replication licensing factor MCM4 | 690.3455 | 3 | -0.1658 | LSEEASQALIEAYVDMRK                         | 109 |
| P33991 | DNA replication licensing factor MCM4 | 567.6441 | 3 | 0.1485  | LSNKVEAIDVEEAKR                            | 152 |
| P33991 | DNA replication licensing factor MCM4 | 714.3805 | 3 | 0.0792  | NLNPEDIDQLITISGMVIR                        | 252 |
| P33991 | DNA replication licensing factor MCM4 | 367.2000 | 3 | -0.0429 | QRPDLGSAQK                                 | 124 |
| P33991 | DNA replication licensing factor MCM4 | 508.0142 | 4 | -0.2248 | RLHGLDEEAEQKLFSEK                          | 81  |
| P33991 | DNA replication licensing factor MCM4 | 414.9225 | 3 | 0.3475  | RVELLKELSR                                 | 71  |
| P33991 | DNA replication licensing factor MCM4 | 348.1821 | 3 | 0.0499  | SFDKNLYR                                   | 106 |

|        |                                       |          |   |         |                            |     |
|--------|---------------------------------------|----------|---|---------|----------------------------|-----|
| P33991 | DNA replication licensing factor MCM4 | 408.4730 | 4 | 0.1329  | SVYKTHIDVIHYR              | 75  |
| P33991 | DNA replication licensing factor MCM4 | 440.4967 | 4 | -0.0311 | SVYKTHIDVIHYRK             | 58  |
| P33991 | DNA replication licensing factor MCM4 | 911.9826 | 2 | 1.4597  | TGIVDISILTTGMSATSR         | 54  |
| P33991 | DNA replication licensing factor MCM4 | 652.0179 | 3 | -0.7997 | TSVLAAANPIESQWNPCK         | 101 |
| P33991 | DNA replication licensing factor MCM4 | 461.2613 | 2 | -0.1477 | VNVTGIYR                   | 76  |
| P33992 | DNA replication licensing factor MCM5 | 582.8133 | 2 | 1.0803  | AIACLLFGGSR                | 88  |
| P33992 | DNA replication licensing factor MCM5 | 595.2787 | 3 | -0.9109 | CPLDPYFIMPDKCK             | 102 |
| P33992 | DNA replication licensing factor MCM5 | 714.3708 | 4 | 0.3975  | EVADEVTRPRPSGEEVLQDIQVMLK  | 84  |
| P33992 | DNA replication licensing factor MCM5 | 502.5191 | 4 | -0.6157 | FAIGSQVSEHSIIKDFTK         | 52  |
| P33992 | DNA replication licensing factor MCM5 | 589.2881 | 3 | 0.2412  | GSSAAGLTASVMRDPSSR         | 83  |
| P33992 | DNA replication licensing factor MCM5 | 568.9506 | 3 | -0.1496 | LQELPDAVPHGEMPR            | 94  |
| P33992 | DNA replication licensing factor MCM5 | 696.3737 | 3 | 0.1428  | NLTNLIAMRPGLEGYALPR        | 84  |
| P33992 | DNA replication licensing factor MCM5 | 332.5310 | 3 | -0.3416 | RFKEFLR                    | 92  |
| P33992 | DNA replication licensing factor MCM5 | 562.9663 | 3 | 1.0444  | RGDINLLMLGDPGTAK           | 124 |
| P33992 | DNA replication licensing factor MCM5 | 613.6271 | 3 | 0.0926  | SFAGAVSPQEEEEFR            | 125 |
| P33992 | DNA replication licensing factor MCM5 | 917.7196 | 3 | 0.3605  | SGFDDPGIFYSDSFGGDAQADEGQAR | 67  |
| P33992 | DNA replication licensing factor MCM5 | 484.5903 | 3 | 0.4230  | SIAPSIFGGTDMKK             | 75  |
| Q14566 | DNA replication licensing factor MCM6 | 334.2015 | 3 | 0.5455  | AGVKATLNAR                 | 64  |
| Q14566 | DNA replication licensing factor MCM6 | 687.8664 | 4 | -0.6408 | ALGVRDLSYRLVFLACCVAPT NPR  | 85  |
| Q14566 | DNA replication licensing factor MCM6 | 708.3772 | 3 | -0.1762 | EIPLAKDFYVAFQDLPTR         | 132 |
| Q14566 | DNA replication licensing factor MCM6 | 598.3003 | 3 | 0.7555  | ESEDFIVEQYKHLR             | 49  |
| Q14566 | DNA replication licensing factor MCM6 | 365.2049 | 3 | 0.2775  | FLLDTNKSR                  | 96  |
| Q14566 | DNA replication licensing factor MCM6 | 346.8626 | 3 | -0.2413 | FVDFQKVR                   | 112 |

|        |                                       |          |   |         |                            |     |
|--------|---------------------------------------|----------|---|---------|----------------------------|-----|
| Q14566 | DNA replication licensing factor MCM6 | 735.3989 | 3 | 4.5709  | FVDFQKVRIQETQAELPR         | 98  |
| Q14566 | DNA replication licensing factor MCM6 | 339.4543 | 4 | 0.0920  | HVKEAFRLLNK                | 54  |
| Q14566 | DNA replication licensing factor MCM6 | 565.6443 | 3 | 0.3425  | IQETQAELPRGSIPR            | 74  |
| Q14566 | DNA replication licensing factor MCM6 | 531.0298 | 4 | 0.6264  | ISKESEDFIVEQYKHLR          | 69  |
| Q14566 | DNA replication licensing factor MCM6 | 521.2617 | 3 | 1.3634  | KVEEEEDDESALKR             | 164 |
| Q14566 | DNA replication licensing factor MCM6 | 884.7572 | 3 | -0.5284 | MDLAAAEPGAGSQHLEVRDEVAEK   | 113 |
| Q14566 | DNA replication licensing factor MCM6 | 562.6250 | 3 | 0.3377  | TSILAAANPISGHYDR           | 121 |
| Q14566 | DNA replication licensing factor MCM6 | 480.6037 | 3 | 0.1131  | VRIQETQAELPR               | 119 |
| Q14566 | DNA replication licensing factor MCM6 | 569.9602 | 3 | -0.2810 | VSGVDGYETEGIRGLR           | 114 |
| P33993 | DNA replication licensing factor MCM7 | 450.5819 | 3 | 0.2258  | ALKDYALEKEK                | 125 |
| P33993 | DNA replication licensing factor MCM7 | 662.8347 | 4 | 0.5299  | EVVNKDVLVDVYIEHRLMMEQR     | 79  |
| P33993 | DNA replication licensing factor MCM7 | 640.6790 | 3 | 0.5216  | LFADAVQELLPQYKER           | 127 |
| P33993 | DNA replication licensing factor MCM7 | 418.2314 | 3 | 0.1677  | QFKYGNQLVR                 | 65  |
| P33993 | DNA replication licensing factor MCM7 | 609.3163 | 3 | -0.0064 | RFELYFQGPSSNKPR            | 126 |
| P33993 | DNA replication licensing factor MCM7 | 571.3099 | 4 | -0.1619 | YAKLFADAVQELLPQYKER        | 118 |
| P33993 | DNA replication licensing factor MCM7 | 382.2277 | 3 | 0.1045  | ADSVGKLVTVR                | 96  |
| P33993 | DNA replication licensing factor MCM7 | 515.3062 | 2 | 0.3469  | AGILTTLNAR                 | 55  |
| P33993 | DNA replication licensing factor MCM7 | 517.6470 | 3 | -0.3478 | ALLLLLGGVDQSPR             | 135 |
| P33993 | DNA replication licensing factor MCM7 | 420.8896 | 3 | -0.1551 | DSLLGDKGQTAR               | 84  |
| P33993 | DNA replication licensing factor MCM7 | 510.2984 | 3 | 0.0843  | EVRADSVGKLVTVR             | 106 |
| P33993 | DNA replication licensing factor MCM7 | 698.3480 | 4 | -0.8026 | FIKFQEMKMQEHSDQVPVGNIPR    | 59  |
| P33993 | DNA replication licensing factor MCM7 | 456.8823 | 3 | -0.2028 | FSEAEQRCVSR                | 54  |
| P33993 | DNA replication licensing factor MCM7 | 995.1455 | 3 | 0.6224  | GFTPAQFQAALDEYEELNVWQVNASR | 131 |



|        |                                       |          |   |         |                           |     |
|--------|---------------------------------------|----------|---|---------|---------------------------|-----|
| P33993 | DNA replication licensing factor MCM7 | 438.2698 | 3 | 0.0261  | GIVTRVSEVKPK              | 63  |
| P33993 | DNA replication licensing factor MCM7 | 678.3896 | 3 | -0.2999 | IAQPGDHVSVTGIFLPILR       | 138 |
| P33993 | DNA replication licensing factor MCM7 | 499.7514 | 4 | -0.1521 | LMEMSKDSSLGDKGQTAR        | 67  |
| P33993 | DNA replication licensing factor MCM7 | 756.0133 | 3 | -0.2404 | MNKSEDESAGELTREELR        | 74  |
| P33993 | DNA replication licensing factor MCM7 | 569.6141 | 3 | 0.2587  | MQEHSQVPVGNIPR            | 50  |
| P33993 | DNA replication licensing factor MCM7 | 631.6205 | 3 | -0.4835 | SEDESAGELTREELR           | 92  |
| P33993 | DNA replication licensing factor MCM7 | 384.2158 | 3 | 0.0889  | SGGRLYLQTR                | 138 |
| P33993 | DNA replication licensing factor MCM7 | 826.9701 | 2 | 0.0413  | SLEQNIQLPAALLSR           | 110 |
| P33993 | DNA replication licensing factor MCM7 | 511.2912 | 3 | -0.0429 | SQLLSYIDRLAPR             | 101 |
| P33993 | DNA replication licensing factor MCM7 | 403.5388 | 3 | -0.2140 | SVRFSEAEQR                | 116 |
| P33993 | DNA replication licensing factor MCM7 | 768.7414 | 3 | 1.0386  | TGFRQVVQGLLSETYLEAHR      | 118 |
| P33993 | DNA replication licensing factor MCM7 | 529.6972 | 5 | -0.3452 | TGFRQVVQGLLSETYLEAHRIVK   | 94  |
| P33993 | DNA replication licensing factor MCM7 | 491.9439 | 3 | -0.2180 | TQRPADVIFATVR             | 102 |
| P33993 | DNA replication licensing factor MCM7 | 543.8026 | 4 | 0.0384  | TQRPADVIFATVRELVSGGR      | 107 |
| C9J4C3 | DNA topoisomerase 2                   | 969.4456 | 3 | 1.0212  | AGEMELKPFNGEDYTCITFQPDLSK | 45  |
| C9J4C3 | DNA topoisomerase 2                   | 423.2225 | 3 | -0.0892 | AYDIAGSTKDVK              | 80  |
| C9J4C3 | DNA topoisomerase 2                   | 365.5380 | 3 | -0.5069 | DKYGVFPLR                 | 65  |
| C9J4C3 | DNA topoisomerase 2                   | 427.2434 | 3 | -0.1949 | DKYGVFPLRGK               | 112 |
| C9J4C3 | DNA topoisomerase 2                   | 541.9494 | 3 | 0.2375  | DPALNSGVSQKPDPAK          | 100 |
| C9J4C3 | DNA topoisomerase 2                   | 468.5590 | 3 | 0.5509  | EAKYFADMKR                | 51  |
| C9J4C3 | DNA topoisomerase 2                   | 543.6435 | 3 | -1.0781 | HRFLEEFITPIVK             | 151 |
| C9J4C3 | DNA topoisomerase 2                   | 681.0491 | 3 | -0.0277 | HVDYVADQIVTKLVDVVK        | 162 |
| C9J4C3 | DNA topoisomerase 2                   | 582.6442 | 3 | -0.1266 | IFDEILVNAADNKQR           | 123 |

|        |                     |          |   |         |                                       |     |
|--------|---------------------|----------|---|---------|---------------------------------------|-----|
| C9J4C3 | DNA topoisomerase 2 | 696.0358 | 3 | -0.4381 | IFDEILVNAADNKQRDPK                    | 55  |
| C9J4C3 | DNA topoisomerase 2 | 389.5595 | 3 | -0.0822 | ILNVREASHK                            | 55  |
| C9J4C3 | DNA topoisomerase 2 | 566.9810 | 3 | -0.5322 | IPNFDVREIVNNIR                        | 72  |
| C9J4C3 | DNA topoisomerase 2 | 464.5129 | 4 | -0.0750 | IPNFDVREIVNNIRR                       | 53  |
| C9J4C3 | DNA topoisomerase 2 | 469.5902 | 3 | 0.1319  | ITIEMKAEAEKK                          | 60  |
| C9J4C3 | DNA topoisomerase 2 | 425.5992 | 3 | 0.2726  | KQTTLAFKPIK                           | 84  |
| C9J4C3 | DNA topoisomerase 2 | 564.5063 | 4 | -0.7549 | KSKGESDDFHMDFDSAVAPR                  | 52  |
| C9J4C3 | DNA topoisomerase 2 | 458.2466 | 3 | 0.4294  | KTQMAEVLPSPR                          | 43  |
| C9J4C3 | DNA topoisomerase 2 | 908.4190 | 3 | -0.2327 | LDDANDAGGRNSTECTLILTEGDSAK            | 120 |
| C9J4C3 | DNA topoisomerase 2 | 375.5318 | 3 | 0.3545  | LHGGKDSASPR                           | 78  |
| C9J4C3 | DNA topoisomerase 2 | 475.2696 | 3 | -0.3213 | LLFPPKDDHTLK                          | 50  |
| C9J4C3 | DNA topoisomerase 2 | 395.5714 | 3 | -0.0518 | LSNKELKPQK                            | 79  |
| C9J4C3 | DNA topoisomerase 2 | 800.7469 | 3 | -0.5023 | MEVSPLQPVNENMQVNKIKK                  | 41  |
| C9J4C3 | DNA topoisomerase 2 | 845.7368 | 3 | -0.7346 | MYVPALIFGQLLTSSNYDDDEK                | 105 |
| C9J4C3 | DNA topoisomerase 2 | 883.1035 | 3 | -0.3986 | MYVPALIFGQLLTSSNYDDDEKK               | 61  |
| C9J4C3 | DNA topoisomerase 2 | 784.1432 | 4 | -0.6536 | MYVPALIFGQLLTSSNYDDDEKKVTGGR          | 142 |
| C9J4C3 | DNA topoisomerase 2 | 494.9072 | 3 | 0.4303  | NYEDEDLTKTLR                          | 76  |
| C9J4C3 | DNA topoisomerase 2 | 475.2562 | 3 | 0.3585  | RAYDIAGSTKDVK                         | 111 |
| C9J4C3 | DNA topoisomerase 2 | 593.9831 | 3 | 0.1333  | RDPALNSGVSQKPDPAK                     | 66  |
| C9J4C3 | DNA topoisomerase 2 | 636.6462 | 3 | -1.0086 | RLMDGEEPLPMLPSYK                      | 50  |
| C9J4C3 | DNA topoisomerase 2 | 500.9328 | 3 | 0.3133  | SIPSMVDGLKPGQR                        | 48  |
| C9J4C3 | DNA topoisomerase 2 | 709.6410 | 3 | -0.2953 | SKGESDDFHMDFDSAVAPR                   | 76  |
| C9J4C3 | DNA topoisomerase 2 | 991.2443 | 4 | 0.0981  | SVVSDLEADDVKGSVPLSSPPATHFPDETEITNPVPK | 44  |

|        |                              |          |   |         |                              |     |
|--------|------------------------------|----------|---|---------|------------------------------|-----|
| C9J4C3 | DNA topoisomerase 2          | 614.8214 | 2 | 0.8599  | TQMAEVLPSPR                  | 101 |
| C9J4C3 | DNA topoisomerase 2          | 804.7299 | 3 | 0.3575  | TWTQTYKEQVLEPMLNGTEK         | 62  |
| C9J4C3 | DNA topoisomerase 2          | 397.9885 | 4 | -0.1083 | VFLNGNKLPVKGFR               | 88  |
| C9J4C3 | DNA topoisomerase 2          | 659.3472 | 2 | 0.3943  | YIFTMLSSLAR                  | 79  |
| Q02880 | DNA topoisomerase 2-beta     | 359.8732 | 3 | -0.8253 | FKAQTQLNK                    | 52  |
| Q02880 | DNA topoisomerase 2-beta     | 414.2347 | 3 | 0.5676  | GKPSSDTVPKPK                 | 81  |
| Q02880 | DNA topoisomerase 2-beta     | 362.8720 | 3 | 0.7570  | GREVNDLKR                    | 70  |
| Q02880 | DNA topoisomerase 2-beta     | 510.6169 | 3 | -0.3885 | HGFLEEFITPIVK                | 174 |
| Q02880 | DNA topoisomerase 2-beta     | 671.3344 | 4 | -0.7738 | HLTYNDFINKELILFSNSDNER       | 134 |
| Q02880 | DNA topoisomerase 2-beta     | 680.3894 | 3 | -0.2464 | HVDYVVDQVVGKLIEVVK           | 91  |
| Q02880 | DNA topoisomerase 2-beta     | 582.6442 | 3 | -0.1266 | IFDEILVNAADNKQR              | 123 |
| Q02880 | DNA topoisomerase 2-beta     | 389.5595 | 3 | -0.0822 | ILNVREASHK                   | 55  |
| Q02880 | DNA topoisomerase 2-beta     | 979.7978 | 3 | -1.0993 | KTSFDQSDVDIFPSDFPTEPPSLPR    | 90  |
| Q02880 | DNA topoisomerase 2-beta     | 760.8743 | 2 | 0.0562  | LQLEETMPSPYGR                | 66  |
| Q02880 | DNA topoisomerase 2-beta     | 500.9438 | 3 | 0.2491  | SIPSLVDGFKPGQR               | 62  |
| Q02880 | DNA topoisomerase 2-beta     | 466.5684 | 3 | -0.3526 | SYDDAESLKTLR                 | 53  |
| Q02880 | DNA topoisomerase 2-beta     | 829.7478 | 3 | -0.8241 | VYVPALIFGQLLTSSNYDDDEK       | 48  |
| Q02880 | DNA topoisomerase 2-beta     | 872.4462 | 3 | -0.7687 | VYVPALIFGQLLTSSNYDDDEKK      | 66  |
| Q02880 | DNA topoisomerase 2-beta     | 772.1515 | 4 | 0.2253  | VYVPALIFGQLLTSSNYDDDEKKVTGGR | 94  |
| P62807 | Histone H2B type 1-C/E/F/G/I | 592.6079 | 3 | 0.0268  | AMGIMNSFVNDIFER              | 189 |
| P62807 | Histone H2B type 1-C/E/F/G/I | 820.7264 | 3 | 0.9082  | AMGIMNSFVNDIFERIAGEASR       | 96  |
| P62807 | Histone H2B type 1-C/E/F/G/I | 328.8502 | 3 | 0.2151  | AVTKYTSSK                    | 75  |
| P62807 | Histone H2B type 1-C/E/F/G/I | 584.3524 | 3 | -0.4233 | EIQTAVRLLLLPGELAK            | 159 |

|        |                                     |           |   |         |                                   |     |
|--------|-------------------------------------|-----------|---|---------|-----------------------------------|-----|
| P62807 | Histone H2B type 1-C/E/F/G/I        | 414.7141  | 2 | -0.0110 | HAVSEGTK                          | 104 |
| P62807 | Histone H2B type 1-C/E/F/G/I        | 409.8946  | 3 | -0.1258 | HAVSEGTKAVTK                      | 175 |
| P62807 | Histone H2B type 1-C/E/F/G/I        | 598.6513  | 3 | -0.1595 | HAVSEGTKAVTKYTSSK                 | 182 |
| P62807 | Histone H2B type 1-C/E/F/G/I        | 529.2901  | 3 | 0.1882  | IAGEASRLAHYNKR                    | 115 |
| P62807 | Histone H2B type 1-C/E/F/G/I        | 422.5519  | 3 | 0.0435  | KESYSVYVYK                        | 89  |
| P62807 | Histone H2B type 1-C/E/F/G/I        | 535.9677  | 3 | 0.0880  | KESYSVYVYKVLK                     | 167 |
| P62807 | Histone H2B type 1-C/E/F/G/I        | 477.3051  | 2 | -0.0812 | LLLPGELAK                         | 71  |
| P62807 | Histone H2B type 1-C/E/F/G/I        | 441.5070  | 4 | -0.1314 | LLLPGELAKHAVSEGTK                 | 76  |
| P62807 | Histone H2B type 1-C/E/F/G/I        | 364.8731  | 3 | -0.4260 | PEPAKSAPAPK                       | 136 |
| P62807 | Histone H2B type 1-C/E/F/G/I        | 390.2034  | 3 | -0.0487 | QVHPDTGISSK                       | 90  |
| P62807 | Histone H2B type 1-C/E/F/G/I        | 539.9726  | 3 | 1.2034  | RSTITSREIQTAVR                    | 104 |
| P62807 | Histone H2B type 1-C/E/F/G/I        | 503.5963  | 3 | -0.3514 | SRKESYSVYVYK                      | 199 |
| P62807 | Histone H2B type 1-C/E/F/G/I        | 487.9388  | 3 | 0.1818  | STITSREIQTAVR                     | 122 |
| P62807 | Histone H2B type 1-C/E/F/G/I        | 599.8522  | 4 | -0.7458 | STITSREIQTAVRLLLPGELAK            | 77  |
| P62807 | Histone H2B type 1-C/E/F/G/I        | 503.6192  | 3 | 0.0631  | VLKQVHPDTGISSK                    | 121 |
| P36776 | Lon protease homolog, mitochondrial | 397.8728  | 3 | -0.0751 | ALCGLDESKAK                       | 100 |
| P36776 | Lon protease homolog, mitochondrial | 356.8577  | 3 | 0.1272  | ALNREYFR                          | 66  |
| P36776 | Lon protease homolog, mitochondrial | 1291.6337 | 3 | 0.0568  | GYQGDPSALLELLDPEQANFLDHYLDVPVDLSK | 78  |
| P36776 | Lon protease homolog, mitochondrial | 775.6318  | 4 | 0.7393  | HVMDVVDEELSKLGLLDNHSSEFNVTR       | 66  |
| P36776 | Lon protease homolog, mitochondrial | 351.8937  | 3 | -0.0234 | ILPVGGIKEK                        | 80  |
| P36776 | Lon protease homolog, mitochondrial | 1059.2101 | 3 | 0.4965  | IVSGEAEVETPENLQDFVGKPVFTVER       | 105 |
| P36776 | Lon protease homolog, mitochondrial | 500.6279  | 3 | -0.4744 | LAIAERYLVPQAR                     | 88  |
| P36776 | Lon protease homolog, mitochondrial | 464.2784  | 3 | -0.4114 | LAQPYVGVFLKR                      | 98  |

|        |                                             |           |   |         |                                        |     |
|--------|---------------------------------------------|-----------|---|---------|----------------------------------------|-----|
| P36776 | Lon protease homolog, mitochondrial         | 603.6695  | 3 | -0.6243 | LSSDVLTLLIKQYCR                        | 116 |
| P36776 | Lon protease homolog, mitochondrial         | 796.9090  | 2 | 0.5307  | NYLDWLTSIPWGK                          | 78  |
| P36776 | Lon protease homolog, mitochondrial         | 923.4608  | 3 | 0.3294  | NYLDWLTSIPWGKYSNENLDLAR                | 113 |
| P36776 | Lon protease homolog, mitochondrial         | 540.5236  | 4 | -0.3397 | QLEVEPEEPEAENKHKPR                     | 74  |
| P36776 | Lon protease homolog, mitochondrial         | 833.3910  | 5 | 0.8011  | RDDSNESDVVESLDEIYHTGTFAQIHEMQDLGDKLR   | 52  |
| P36776 | Lon protease homolog, mitochondrial         | 906.9663  | 4 | 0.3790  | SAYKIVSGEAEVVEVTPENLQDFVGKPVFTVER      | 54  |
| P36776 | Lon protease homolog, mitochondrial         | 609.0070  | 3 | -0.5357 | TENPLILIDEVDKIGR                       | 118 |
| P36776 | Lon protease homolog, mitochondrial         | 737.8916  | 4 | -1.0571 | TIRDIIALNPLYRESVLQMMQAGQR              | 101 |
| P36776 | Lon protease homolog, mitochondrial         | 685.3879  | 3 | 0.0298  | TKTENPLILIDEVDKIGR                     | 139 |
| P36776 | Lon protease homolog, mitochondrial         | 1228.9365 | 3 | 0.5697  | VVDNPIYLSDMGAALTGAESHELQDVLEETNIPK     | 117 |
| P36776 | Lon protease homolog, mitochondrial         | 849.8335  | 5 | 0.0203  | VVDNPIYLSDMGAALTGAESHELQDVLEETNIPKRLYK | 48  |
| P36776 | Lon protease homolog, mitochondrial         | 597.7911  | 2 | 0.3798  | YSNENLDLAR                             | 77  |
| Q14676 | Mediator of DNA damage checkpoint protein 1 | 980.8607  | 3 | 0.4982  | AAESLTAIPEPASPQLLETPIHASQIQK           | 36  |
| Q14676 | Mediator of DNA damage checkpoint protein 1 | 888.2282  | 4 | -0.1156 | AAESLTAIPEPASPQLLETPIHASQIQKVEPAGR     | 39  |
| Q14676 | Mediator of DNA damage checkpoint protein 1 | 600.3101  | 4 | -0.5916 | AAGNPGSLAAPIDHKPCSAPLEPK               | 42  |
| Q14676 | Mediator of DNA damage checkpoint protein 1 | 514.2499  | 3 | 0.0060  | DQAEEEPNRIPSR                          | 88  |
| Q14676 | Mediator of DNA damage checkpoint protein 1 | 748.0326  | 3 | 0.3126  | LEPSTSTDQPVTPEPTSQATR                  | 52  |
| Q14676 | Mediator of DNA damage checkpoint protein 1 | 852.1740  | 4 | -0.7820 | MTPFPATSAAPEPHSTSTAQPVTPKPTSQATR       | 38  |
| Q14676 | Mediator of DNA damage checkpoint protein 1 | 934.7285  | 4 | 0.2094  | SSGKTPETLVPTAPKLEPSTSTDQPVTPEPTSQATR   | 88  |
| Q14676 | Mediator of DNA damage checkpoint protein 1 | 756.8936  | 4 | -0.1103 | SSVKTPEPVVPTAPEPHPTTSTDQPVTPK          | 50  |
| Q14676 | Mediator of DNA damage checkpoint protein 1 | 1145.2493 | 3 | 0.1649  | SSVKTPEVVVPAPELQPSTSTDQPVTPEPTSR       | 75  |
| Q14676 | Mediator of DNA damage checkpoint protein 1 | 950.2405  | 4 | -0.1154 | SSVKTPEVVVPTALELQPSTSTDRPVTSEPTSQATR   | 82  |
| Q14676 | Mediator of DNA damage checkpoint protein 1 | 1133.2372 | 3 | 0.0006  | SSVKTPEVVVPTAPELQASASTDQPVTSEPTSR      | 82  |

|        |                                             |           |   |         |                                     |     |
|--------|---------------------------------------------|-----------|---|---------|-------------------------------------|-----|
| Q14676 | Mediator of DNA damage checkpoint protein 1 | 1126.2300 | 3 | -0.3539 | TPEPVVPTAPELQPSTSTDQPVTSEPTSQVTR    | 79  |
| Q14676 | Mediator of DNA damage checkpoint protein 1 | 875.1132  | 3 | -0.0843 | TPEPVVPTAPEPHPTTSTDQPVTPK           | 105 |
| Q14676 | Mediator of DNA damage checkpoint protein 1 | 1011.5068 | 3 | -0.9907 | TPETVVVPAPELQPSTSTDQPVTPEPTSR       | 62  |
| Q14676 | Mediator of DNA damage checkpoint protein 1 | 999.4947  | 3 | 0.0003  | TPETVVVPTAPELQASASTDQPVTSEPTSR      | 86  |
| Q14676 | Mediator of DNA damage checkpoint protein 1 | 1026.5382 | 3 | -0.0080 | TPETVVVPTAPELQISTSTDQPVTPKPTSR      | 104 |
| Q14676 | Mediator of DNA damage checkpoint protein 1 | 1165.2493 | 3 | -0.1516 | TPKPVVEPAASDLEPFTPTDQSVTPEAIAQGGQSK | 74  |
| P19338 | Nucleolin, isoform 1                        | 348.1929  | 3 | 0.1356  | AGKNQGDPPK                          | 133 |
| P19338 | Nucleolin, isoform 1                        | 384.8998  | 3 | -0.2113 | AIRLELQGPR                          | 138 |
| P19338 | Nucleolin, isoform 1                        | 578.9956  | 3 | 0.6816  | AIRLELQGRGSPNAR                     | 104 |
| P19338 | Nucleolin, isoform 1                        | 544.6504  | 3 | -0.2532 | ALELTGLKVFGEIK                      | 166 |
| P19338 | Nucleolin, isoform 1                        | 498.3118  | 3 | -0.1267 | ALVATPGKKGAAPAK                     | 47  |
| P19338 | Nucleolin, isoform 1                        | 482.2684  | 3 | 0.1004  | ATFIKVPQNQNGK                       | 80  |
| P19338 | Nucleolin, isoform 1                        | 438.2576  | 3 | -0.2129 | AVTTPGKKGATPGK                      | 73  |
| P19338 | Nucleolin, isoform 1                        | 782.7143  | 3 | 0.6047  | EAMEDGEIDGNKVTLDWAKPK               | 111 |
| P19338 | Nucleolin, isoform 1                        | 816.1696  | 4 | -0.1778 | FGYVDFESAEDLEKALELTGLKVFGEIK        | 41  |
| P19338 | Nucleolin, isoform 1                        | 465.9488  | 3 | 0.2718  | GATPGKALVATPGKK                     | 82  |
| P19338 | Nucleolin, isoform 1                        | 781.3439  | 2 | 0.2731  | GFGFVDFNSEEDAK                      | 130 |
| P19338 | Nucleolin, isoform 1                        | 611.2881  | 3 | -0.1322 | GFGFVDFNSEEDAKAAK                   | 87  |
| P19338 | Nucleolin, isoform 1                        | 734.0132  | 3 | 0.5886  | GLSEDTTEETLKESFDGSVR                | 158 |
| P19338 | Nucleolin, isoform 1                        | 809.7260  | 3 | 0.8582  | GLSEDTTEETLKESFDGSVRAR              | 95  |
| P19338 | Nucleolin, isoform 1                        | 700.3228  | 3 | 0.0594  | GQNQDYRGGKNSTWSGESK                 | 60  |
| P19338 | Nucleolin, isoform 1                        | 667.5682  | 4 | -0.2765 | GYAFIEFASFEDAKEALNSCNKR             | 95  |
| P19338 | Nucleolin, isoform 1                        | 912.4314  | 3 | -0.2406 | IVTDRETGSSKGFVDFNSEEDAK             | 143 |

|        |                      |           |   |         |                                      |     |
|--------|----------------------|-----------|---|---------|--------------------------------------|-----|
| P19338 | Nucleolin, isoform 1 | 592.9491  | 3 | 0.9760  | KFGYVDFESAEDLEK                      | 119 |
| P19338 | Nucleolin, isoform 1 | 651.3376  | 4 | -0.7448 | KFGYVDFESAEDLEKALELTGLK              | 105 |
| P19338 | Nucleolin, isoform 1 | 337.8818  | 3 | 0.2470  | KGAAIPAKGAK                          | 103 |
| P19338 | Nucleolin, isoform 1 | 899.4729  | 3 | 0.5416  | KQKVEGTEPTTAFNLFVGNLNFNK             | 140 |
| P19338 | Nucleolin, isoform 1 | 338.2220  | 3 | -0.5283 | KVAVATPAKK                           | 111 |
| P19338 | Nucleolin, isoform 1 | 329.2183  | 3 | -0.6655 | KVVVSPTKK                            | 109 |
| P19338 | Nucleolin, isoform 1 | 1024.4361 | 4 | -0.8873 | MAPPPKEVEEDSEDEEMSEDEEDDSSGEEVVIPQKK | 73  |
| P19338 | Nucleolin, isoform 1 | 869.7815  | 3 | 0.1240  | NLPYKVTQDELKEVFEDAAEIR               | 135 |
| P19338 | Nucleolin, isoform 1 | 1159.9018 | 3 | 0.0594  | NSTWSGESKTLVLSNLSYSATEETLQEVFEK      | 159 |
| P19338 | Nucleolin, isoform 1 | 673.0006  | 3 | -0.3923 | QGTEIDGRSISLYYTGEK                   | 40  |
| P19338 | Nucleolin, isoform 1 | 856.7746  | 3 | -0.2439 | QKVEGTEPTTAFNLFVGNLNFNK              | 101 |
| P19338 | Nucleolin, isoform 1 | 799.1687  | 4 | -0.4634 | QKVEGTEPTTAFNLFVGNLNFNKSAPELK        | 41  |
| P19338 | Nucleolin, isoform 1 | 848.7938  | 3 | 0.7305  | SAPELKTGISDVFAKNDLAVVDVR             | 157 |
| P19338 | Nucleolin, isoform 1 | 674.6570  | 3 | -0.3313 | SISLYYTGEKGQNQDYR                    | 136 |
| P19338 | Nucleolin, isoform 1 | 755.3696  | 3 | -0.2550 | SISLYYTGEKGQNQDYRGGK                 | 125 |
| P19338 | Nucleolin, isoform 1 | 378.8888  | 3 | -0.0213 | SQPSKTLFVK                           | 71  |
| P19338 | Nucleolin, isoform 1 | 503.9108  | 3 | -0.2130 | TFEEKQGTEIDGR                        | 124 |
| P19338 | Nucleolin, isoform 1 | 640.3459  | 3 | 0.4741  | TGISDVFAKNDLAVVDVR                   | 146 |
| P19338 | Nucleolin, isoform 1 | 826.4442  | 3 | 0.2521  | TGISDVFAKNDLAVVDVRIGMTR              | 50  |
| P19338 | Nucleolin, isoform 1 | 930.1344  | 3 | -0.1070 | TLFVKGLSEDTEETLKESFDGSVR             | 136 |
| P19338 | Nucleolin, isoform 1 | 834.4268  | 3 | -0.3273 | TLVLSNLSYSATEETLQEVFEK               | 232 |
| P19338 | Nucleolin, isoform 1 | 1021.2042 | 3 | -0.2678 | TLVLSNLSYSATEETLQEVFEKATFIK          | 80  |
| P19338 | Nucleolin, isoform 1 | 982.5151  | 4 | -0.8613 | TLVLSNLSYSATEETLQEVFEKATFIKVPQNQNGK  | 61  |

|        |                                            |           |   |         |                               |     |
|--------|--------------------------------------------|-----------|---|---------|-------------------------------|-----|
| P19338 | Nucleolin, isoform 1                       | 771.3901  | 3 | 0.5138  | VEGTEPTTAFNLFVGNLNFNK         | 259 |
| P19338 | Nucleolin, isoform 1                       | 979.8379  | 3 | -0.5022 | VEGTEPTTAFNLFVGNLNFNKSAPELK   | 78  |
| P19338 | Nucleolin, isoform 1                       | 351.2080  | 4 | 0.2442  | VFGNEIKLEKPK                  | 72  |
| P19338 | Nucleolin, isoform 1                       | 664.6689  | 3 | 0.2744  | VTQDELKEVFEDAAEIR             | 148 |
| P19338 | Nucleolin, isoform 1                       | 807.0954  | 3 | 0.9731  | VTQDELKEVFEDAAEIRLVSK         | 129 |
| P13010 | Protein X-ray repair cross-complementing 5 | 321.8468  | 3 | -0.3177 | AFREEAIK                      | 53  |
| P13010 | Protein X-ray repair cross-complementing 5 | 807.6841  | 4 | 0.2029  | ALHPREPLPPIQQHIWNMLNPPAEVTTK  | 76  |
| P13010 | Protein X-ray repair cross-complementing 5 | 1106.1871 | 3 | 0.6769  | ASFEEASNQLINHIEQFLDTNETPYFMK  | 154 |
| P13010 | Protein X-ray repair cross-complementing 5 | 780.1238  | 4 | 0.6511  | CDISLQFFLPSLKGEDGSGDRGDGPFR   | 36  |
| P13010 | Protein X-ray repair cross-complementing 5 | 913.8005  | 3 | -0.7129 | DDEAAAVALSSLIHALDDLDMVAIVR    | 107 |
| P13010 | Protein X-ray repair cross-complementing 5 | 842.3794  | 3 | -0.0605 | DKPSGDTAAVFEEGGDVDDLDMI       | 88  |
| P13010 | Protein X-ray repair cross-complementing 5 | 748.3452  | 3 | -0.3412 | DQVTAQEIFQDNHEDGPTAK          | 82  |
| P13010 | Protein X-ray repair cross-complementing 5 | 885.1317  | 3 | 0.5489  | EPLPPIQQHIWNMLNPPAEVTTK       | 55  |
| P13010 | Protein X-ray repair cross-complementing 5 | 967.7868  | 3 | 0.2773  | ETVYCLNDDDETEVLKEDIHQGFR      | 58  |
| P13010 | Protein X-ray repair cross-complementing 5 | 1027.8251 | 3 | -0.1540 | FLAPKDKPSGDTAAVFEEGGDVDDLDMI  | 100 |
| P13010 | Protein X-ray repair cross-complementing 5 | 506.6101  | 3 | 0.0296  | FQRLFQCLLHR                   | 192 |
| P13010 | Protein X-ray repair cross-complementing 5 | 524.6262  | 3 | -0.1383 | GITEQQKEGLEIVK                | 49  |
| P13010 | Protein X-ray repair cross-complementing 5 | 560.6299  | 3 | -0.1422 | HIEIFTDLSSRFSK                | 80  |
| P13010 | Protein X-ray repair cross-complementing 5 | 644.3204  | 3 | 0.0887  | HLMLPDFDLLEDIESK              | 180 |
| P13010 | Protein X-ray repair cross-complementing 5 | 431.2505  | 3 | -0.0060 | IAAYKSILQER                   | 122 |
| P13010 | Protein X-ray repair cross-complementing 5 | 424.9357  | 3 | -0.3596 | IKTLFPLIEAK                   | 135 |
| P13010 | Protein X-ray repair cross-complementing 5 | 865.9146  | 4 | -0.2009 | KASFEEASNQLINHIEQFLDTNETPYFMK | 56  |
| P13010 | Protein X-ray repair cross-complementing 5 | 627.6544  | 3 | 0.1370  | KDEKTDLTLEDLFPTTK             | 121 |



|        |                                            |           |   |         |                                     |     |
|--------|--------------------------------------------|-----------|---|---------|-------------------------------------|-----|
| P13010 | Protein X-ray repair cross-complementing 5 | 833.7419  | 3 | -0.1027 | KKDQVTAQEIFQDNHEDGPTAK              | 189 |
| P13010 | Protein X-ray repair cross-complementing 5 | 873.4445  | 4 | 0.7922  | KLKTEQGGAHFSVSSLAEGSVTSVGSVNPAENFR  | 52  |
| P13010 | Protein X-ray repair cross-complementing 5 | 822.4246  | 3 | -0.1309 | KYAPTEAQLNAVDALIDSMSLAK             | 134 |
| P13010 | Protein X-ray repair cross-complementing 5 | 362.8674  | 3 | -0.0958 | LFQCLLHR                            | 115 |
| P13010 | Protein X-ray repair cross-complementing 5 | 370.5416  | 3 | 0.1109  | LGGHGPSFPLK                         | 106 |
| P13010 | Protein X-ray repair cross-complementing 5 | 888.1569  | 3 | -0.1796 | LGGHGPSFPLKGITEQQKEGLEIVK           | 99  |
| P13010 | Protein X-ray repair cross-complementing 5 | 841.4207  | 4 | -0.2742 | LKTEQGGAHFSVSSLAEGSVTSVGSVNPAENFR   | 55  |
| P13010 | Protein X-ray repair cross-complementing 5 | 1016.2514 | 4 | -0.6479 | QVFAENKDEIALVLFGTDTNPLSGGDQYQNITVHR | 139 |
| P13010 | Protein X-ray repair cross-complementing 5 | 338.5500  | 3 | -0.3166 | SQIPLSKIK                           | 51  |
| P13010 | Protein X-ray repair cross-complementing 5 | 653.3458  | 3 | -0.0569 | TDTLEDLFPTTKIPNPR                   | 132 |
| P13010 | Protein X-ray repair cross-complementing 5 | 368.2204  | 3 | -0.7047 | TLKKEDIQK                           | 116 |
| P13010 | Protein X-ray repair cross-complementing 5 | 817.6815  | 4 | 0.0599  | VFAARDDEAAVALSSLIHALDDLDMVAIVR      | 127 |
| P13010 | Protein X-ray repair cross-complementing 5 | 505.2786  | 2 | 0.1154  | VITMFVQR                            | 96  |
| P13010 | Protein X-ray repair cross-complementing 5 | 779.7263  | 3 | 0.2345  | YAPTEAQLNAVDALIDSMSLAK              | 223 |
| P13010 | Protein X-ray repair cross-complementing 5 | 657.9838  | 3 | 0.0965  | YGSDIVPFSKVDDEEQMK                  | 104 |
| P46060 | Ran GTPase-activating protein 1            | 878.7784  | 3 | -0.9728 | AIANLYGPLMALNHMVQQDYFPK             | 53  |
| P46060 | Ran GTPase-activating protein 1            | 859.4684  | 3 | 0.1677  | ALAPLLLAFFVTKPNSALESCSFAR           | 121 |
| P46060 | Ran GTPase-activating protein 1            | 601.3506  | 2 | 0.2345  | HSLLTLYKV                           | 66  |
| P46060 | Ran GTPase-activating protein 1            | 1097.5659 | 3 | 1.1537  | ILDPTGEPAPVLSSPPPADVSTFLAFPSPEK     | 105 |
| P46060 | Ran GTPase-activating protein 1            | 1224.9890 | 3 | 0.6336  | ILDPTGEPAPVLSSPPPADVSTFLAFPSPEKLLR  | 68  |
| P46060 | Ran GTPase-activating protein 1            | 541.9895  | 3 | 0.0794  | SKGAVAIADAIRGGLPK                   | 80  |
| P46060 | Ran GTPase-activating protein 1            | 821.7708  | 3 | -0.1952 | SSVLIAQQTDTSDPEKVVSAFLK             | 102 |
| P46060 | Ran GTPase-activating protein 1            | 440.9139  | 3 | 0.2841  | TQVAGGQLSFKGK                       | 44  |

|        |                                              |           |   |         |                                      |     |
|--------|----------------------------------------------|-----------|---|---------|--------------------------------------|-----|
| P46060 | Ran GTPase-activating protein 1              | 446.5735  | 3 | -0.0226 | VSSVFKDEATVR                         | 55  |
| P43487 | Ran-specific GTPase-activating protein       | 984.1847  | 4 | -0.2676 | DTHEDHDTSTENTDESNHDPQFEPIVSLPEQEIK   | 93  |
| P43487 | Ran-specific GTPase-activating protein       | 540.9266  | 3 | -0.1036 | FASENDLPEWKER                        | 168 |
| P43487 | Ran-specific GTPase-activating protein       | 726.6869  | 3 | -0.1946 | FASENDLPEWKERGTGDVK                  | 80  |
| P43487 | Ran-specific GTPase-activating protein       | 437.2348  | 3 | 0.3173  | FLNAENAQKFK                          | 83  |
| P43487 | Ran-specific GTPase-activating protein       | 613.2870  | 4 | -0.0831 | ICANHYYITPMMELKPNAGSDR               | 49  |
| P43487 | Ran-specific GTPase-activating protein       | 510.0102  | 4 | -0.2324 | LFRFASENDLPEWKER                     | 107 |
| P43487 | Ran-specific GTPase-activating protein       | 691.3221  | 2 | 0.2915  | TLEEDDEELFK                          | 101 |
| P43487 | Ran-specific GTPase-activating protein       | 556.9310  | 3 | 0.3946  | TLEEDDEELFKMR                        | 139 |
| P23246 | Splicing factor, proline- and glutamine-rich | 426.2032  | 3 | 0.2319  | AELDDTPMRGR                          | 55  |
| P23246 | Splicing factor, proline- and glutamine-rich | 426.2032  | 3 | 0.1462  | AELDDTPMRGR                          | 55  |
| P23246 | Splicing factor, proline- and glutamine-rich | 581.9697  | 3 | -0.3033 | ALAEIAKAELDDTPMR                     | 150 |
| P23246 | Splicing factor, proline- and glutamine-rich | 658.3422  | 3 | -0.2152 | ALAEIAKAELDDTPMRGR                   | 91  |
| P23246 | Splicing factor, proline- and glutamine-rich | 491.6108  | 3 | -0.3333 | AVVIVDDRGRSTGK                       | 61  |
| P23246 | Splicing factor, proline- and glutamine-rich | 760.7196  | 3 | -0.4043 | CRLFVGNLPADITEDEFKR                  | 103 |
| P23246 | Splicing factor, proline- and glutamine-rich | 1199.6062 | 3 | 0.4770  | CSEGVFLLTTTPRPVIVEPLEQLDDEDGLPEK     | 154 |
| P23246 | Splicing factor, proline- and glutamine-rich | 1010.0251 | 4 | -0.5049 | CSEGVFLLTTTPRPVIVEPLEQLDDEDGLPEKLAQK | 69  |
| P23246 | Splicing factor, proline- and glutamine-rich | 588.2655  | 3 | -0.0092 | FAQHGTFEYEYSQR                       | 121 |
| P23246 | Splicing factor, proline- and glutamine-rich | 519.9945  | 4 | 0.0294  | FAQHGTFEYEYSQRWK                     | 84  |
| P23246 | Splicing factor, proline- and glutamine-rich | 381.8805  | 3 | 3.1809  | FATHAAALSVR                          | 80  |
| P23246 | Splicing factor, proline- and glutamine-rich | 941.7324  | 4 | 0.4736  | FATHAAALSVRNLSPLYVSNELLEAFSQFGPIER   | 62  |
| P23246 | Splicing factor, proline- and glutamine-rich | 671.3366  | 2 | 0.0895  | FGQGGAGPVGGQGPR                      | 74  |
| P23246 | Splicing factor, proline- and glutamine-rich | 820.3926  | 3 | -0.9705 | FGQGGAGPVGGQGPRGMGPOTPAGYGR          | 86  |

|        |                                              |          |   |         |                             |     |
|--------|----------------------------------------------|----------|---|---------|-----------------------------|-----|
| P23246 | Splicing factor, proline- and glutamine-rich | 385.2170 | 3 | -0.5874 | GFGFIKLESR                  | 96  |
| P23246 | Splicing factor, proline- and glutamine-rich | 535.4616 | 5 | -0.3647 | GGRQHHPYHQHHQGGPPGPGGR      | 79  |
| P23246 | Splicing factor, proline- and glutamine-rich | 415.9032 | 3 | -0.0279 | GIVEFASKPAAR                | 82  |
| P23246 | Splicing factor, proline- and glutamine-rich | 415.9032 | 3 | -0.0675 | GIVEFASKPAAR                | 82  |
| P23246 | Splicing factor, proline- and glutamine-rich | 458.6015 | 3 | -0.3023 | GIVEFASKPAARK               | 56  |
| P23246 | Splicing factor, proline- and glutamine-rich | 335.4437 | 4 | -0.1112 | GKGFIFIKLESR                | 71  |
| P23246 | Splicing factor, proline- and glutamine-rich | 550.6334 | 3 | 0.2175  | ISDSEGFKANLSLLR             | 161 |
| P23246 | Splicing factor, proline- and glutamine-rich | 412.8850 | 3 | -0.1042 | LAQKNPMYQK                  | 70  |
| P23246 | Splicing factor, proline- and glutamine-rich | 655.3423 | 3 | -0.2395 | LFVGNLPADITEDEFKR           | 94  |
| P23246 | Splicing factor, proline- and glutamine-rich | 606.5797 | 4 | -0.0481 | LFVGNLPADITEDEFKRLFAK       | 100 |
| P23246 | Splicing factor, proline- and glutamine-rich | 593.3117 | 4 | -0.7630 | MPGGPKPGGGPGLSTPGGHPKPPHR   | 73  |
| P23246 | Splicing factor, proline- and glutamine-rich | 880.4378 | 3 | -0.1505 | NLSPYVSNELLEAFSQFGPIER      | 199 |
| P23246 | Splicing factor, proline- and glutamine-rich | 601.5392 | 4 | -0.2203 | QHHPYHQHHQGGPPGPGGR         | 53  |
| P23246 | Splicing factor, proline- and glutamine-rich | 412.5546 | 3 | -0.8042 | RPGEKTYTQR                  | 126 |
| P23246 | Splicing factor, proline- and glutamine-rich | 531.5299 | 4 | -0.7422 | SEEKISDSEGFKANLSLLR         | 97  |
| P23246 | Splicing factor, proline- and glutamine-rich | 626.3072 | 3 | 0.1167  | SLDEMEKQQREQVEK             | 76  |
| P23246 | Splicing factor, proline- and glutamine-rich | 405.4782 | 4 | 0.2990  | STGKGIVEFASKPAAR            | 121 |
| P23246 | Splicing factor, proline- and glutamine-rich | 576.6239 | 3 | 0.1482  | TERFGQGGAGPVGGQGPR          | 105 |
| P23246 | Splicing factor, proline- and glutamine-rich | 466.9370 | 3 | 0.3792  | VRFATHAAALSVR               | 86  |
| P23246 | Splicing factor, proline- and glutamine-rich | 479.9173 | 3 | -0.6885 | YGEPGEVFINKGK               | 128 |
| Q13428 | Treacle protein                              | 558.3003 | 3 | -0.3191 | ISDGKKQEGPATQVSK            | 124 |
| Q13428 | Treacle protein                              | 867.7716 | 3 | -1.3755 | TQPSSGVDSAVGTLPATSPQSTSVQAK | 154 |
| Q13428 | Treacle protein                              | 769.0910 | 3 | -0.0804 | AAISNKITSCIFQLLQEAGIK       | 131 |

|        |                 |          |   |         |                        |     |
|--------|-----------------|----------|---|---------|------------------------|-----|
| Q13428 | Treacle protein | 645.3738 | 3 | 0.1560  | AASVPVKGSLGQGTAPVLP GK | 84  |
| Q13428 | Treacle protein | 688.8092 | 2 | -0.7972 | GMGTVEGGDQSNPK         | 76  |
| Q13428 | Treacle protein | 634.6411 | 3 | -0.8727 | GSLGSQGAKDEPEEELQK     | 40  |
| Q13428 | Treacle protein | 523.9702 | 3 | 0.0532  | GTISAPGKVV TAAAQAK     | 114 |
| Q13428 | Treacle protein | 434.5735 | 3 | 0.1224  | KAEEDAALQAKK           | 103 |
| Q13428 | Treacle protein | 679.0174 | 3 | 1.3368  | LASTNSSVLGADLPSSMKEK   | 66  |
| Q13428 | Treacle protein | 573.2919 | 3 | -0.2487 | SPQVKPASTMGMGPLGK      | 105 |
| Q13428 | Treacle protein | 465.7664 | 2 | 0.8273  | TGPTVTQVK              | 68  |
| Q13428 | Treacle protein | 441.8994 | 3 | -0.1997 | TNVVTMPTAHPR           | 105 |
| Q13428 | Treacle protein | 519.6058 | 3 | -1.0026 | TSQVGAASAPAKESPR       | 48  |

---
